# Supplementary material
Source: PubMed Central journal article supplement (PMC9069071)
Supplement: mmc1.pdf [file mmc1.pdf]

**Supplemental information**

**Familial long-read sequencing increases**

**yield of *de novo* mutations**

**Michelle D. Noyes, William T. Harvey, David Porubsky, Arvis Sulovari, Ruiyang Li, Nicholas R. Rose, Peter A. Audano, Katherine M. Munson, Alexandra P. Lewis, Kendra Hoekzema, Tuomo Mantere, Tina A. Graves-Lindsay, Ashley D. Sanders, Sara Goodwin, Melissa Kramer, Younes Mokrab, Michael C. Zody, Alexander Hoischen, Jan O. Korbel, W. Richard McCombie, and Evan E. Eichler**

## Supplemental Figures

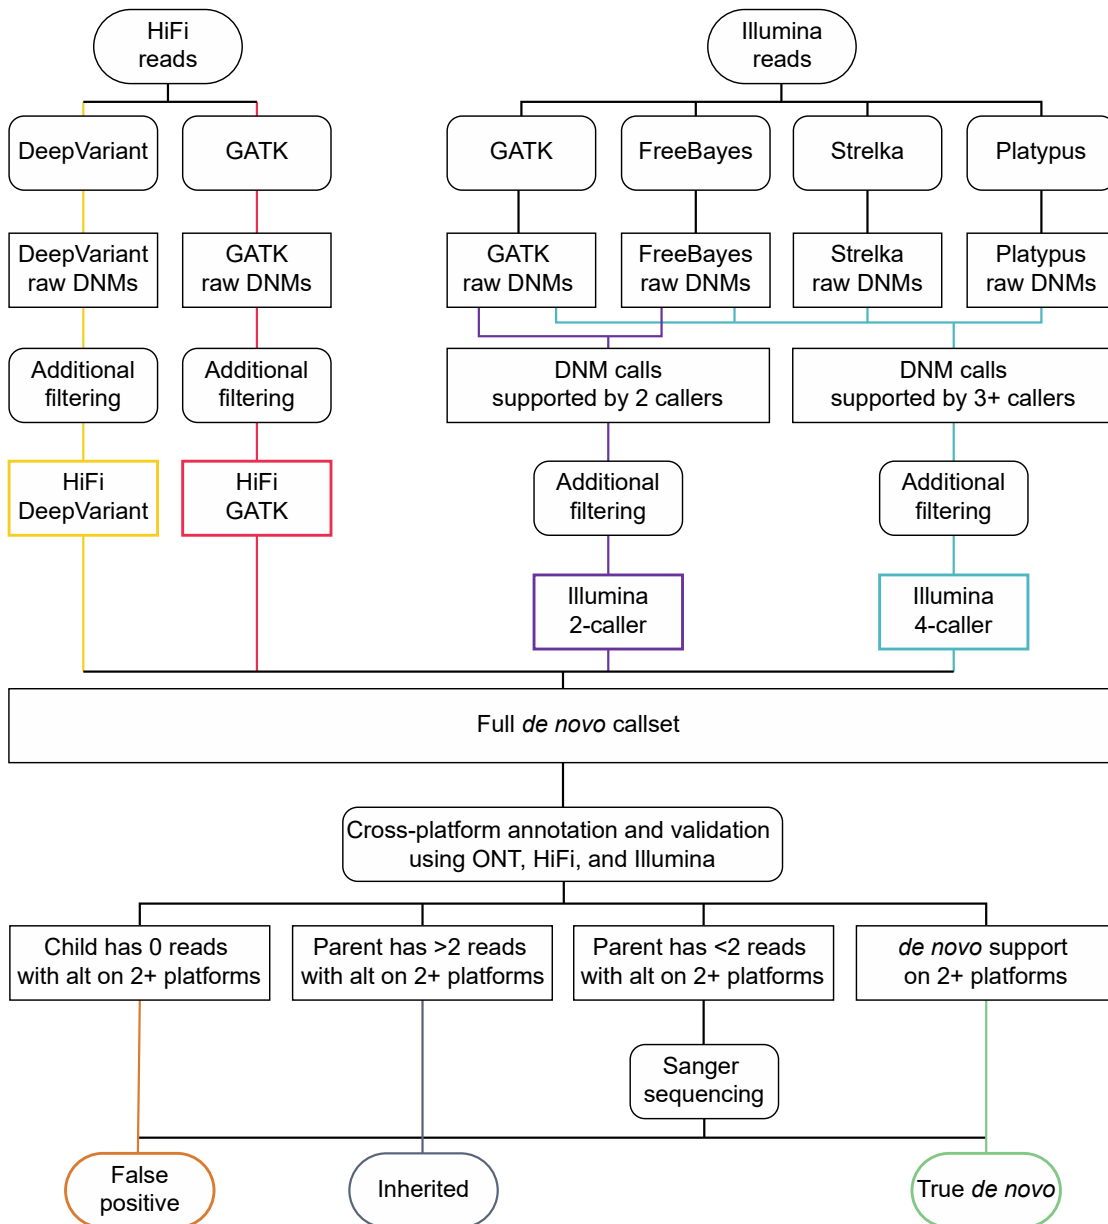

**Figure S1. Pipeline for *de novo* SNV and small (<20 bp) indel identification.** PacBio HiFi and Illumina reads were used for DNM discovery. Both technologies were used in addition to Oxford Nanopore Technologies (ONT) sequencing data for validation of *de novo* candidate sites.

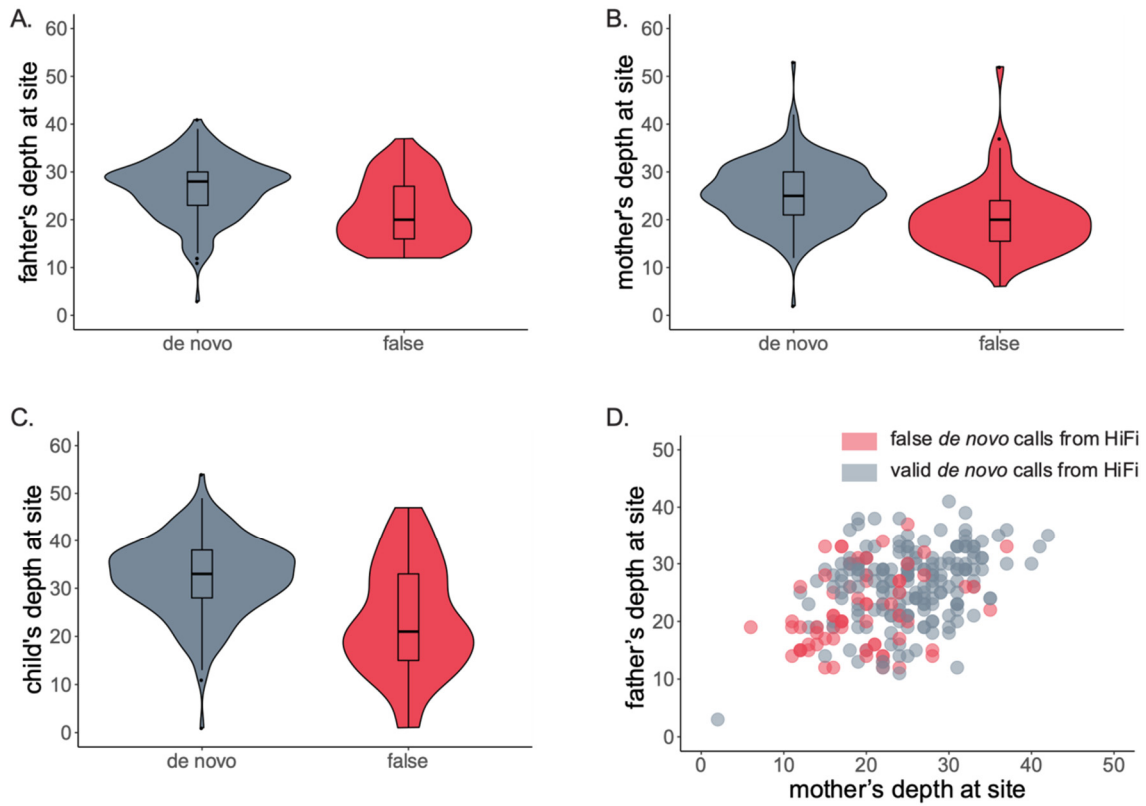

**Figure S2. Read depth comparison between true and false calls made by HiFi callers.** For all true *de novo* and false calls made by HiFi callers, a comparison of read depth at the site of the call in (A) the father, (B) the mother, and (C) the child with the *de novo* call. In (D), the father's depth at the site plotted against the mother's depth, false calls show significantly lower parental read depth than true calls.

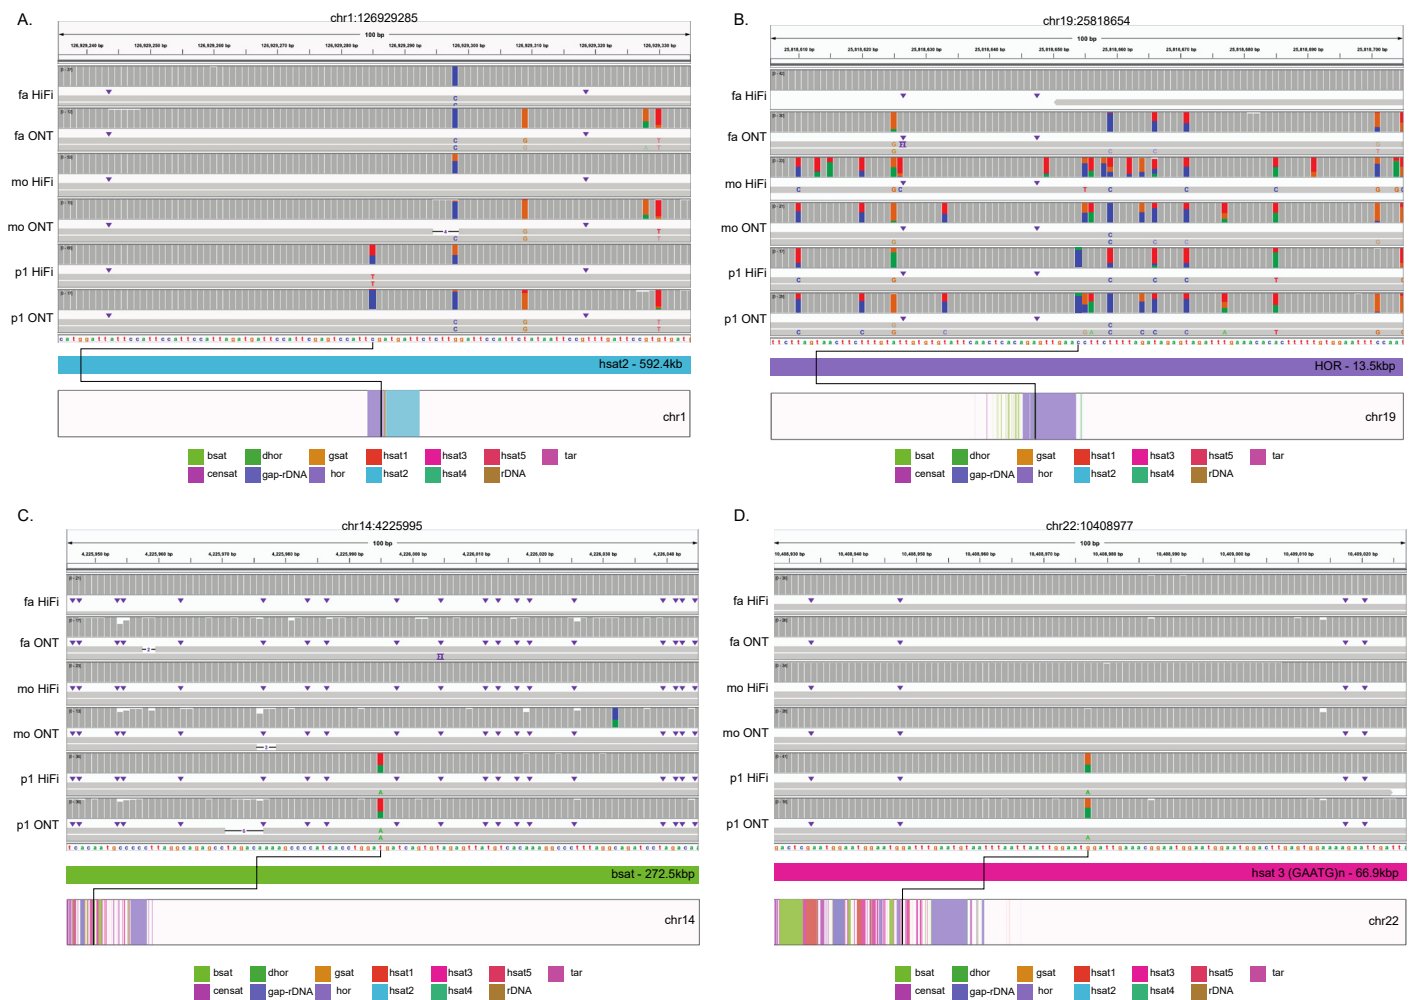

**Figure S3. IGV shots of centromeric DNMs. (A-D)** IGV shots of PacBio HiFi and ONT reads aligned to centromeric heterochromatic satellite regions. Underneath the reads is the location of the variant in its repetitive context, and below that is the chromosome with centromeric repeats annotated. All DNMs except B (chr19\_25818654\_C\_A) are considered true positive events.

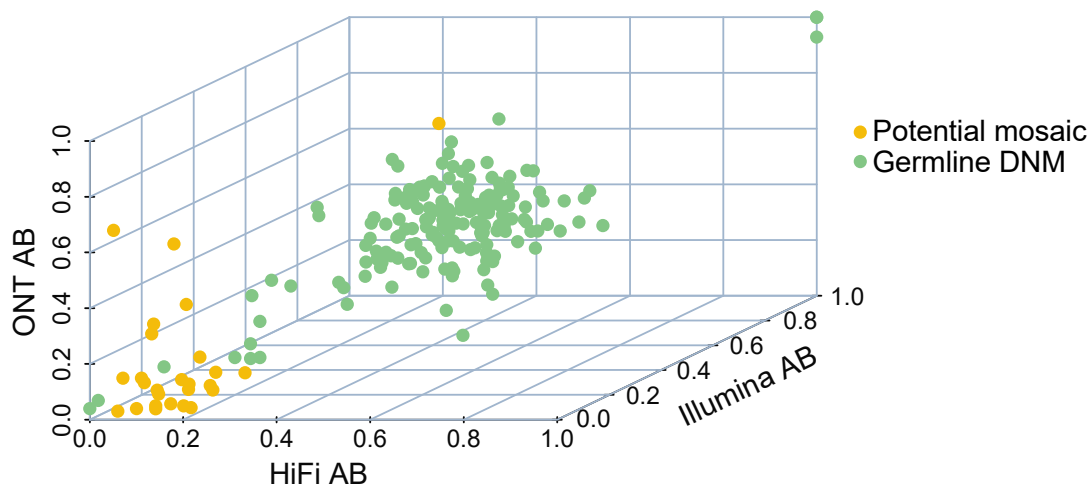

**Figure S4. Allele balance in validated DNMs and potential mosaic mutations.** The allele balance in the child with the mutation is shown across three sequencing platforms: ONT, PacBio HiFi, and Illumina. The potential mosaic mutations are in yellow, and validated *de novo* SNVs are shown in green. The germline sites that are clustered with the mosaic mutations were only observed in GRCh38-aligned reads and, accordingly, have very low allele balance (AB) in T2T-CHM13 aligned data.

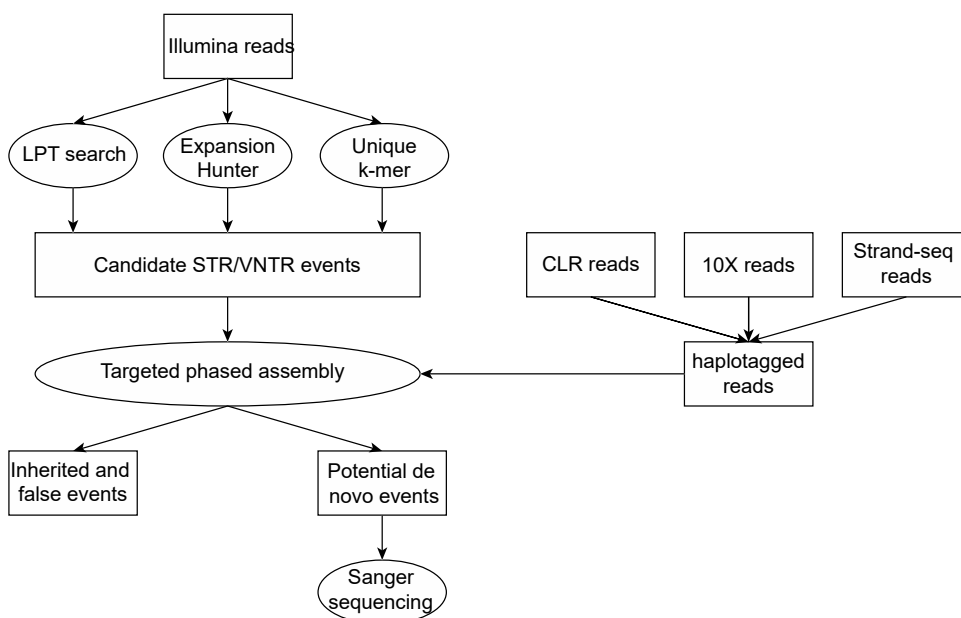

**Figure S5. STR and VNTR calling pipeline.** This pipeline identifies candidate STR and VNTR mutations in Illumina data. HiFi continuous long-read (CLR) data were assigned haplotypes using Chromium 10X genomic sequencing (10X) and single-cell DNA template strand sequencing (Strand-seq) data. These haplotagged reads were used for targeted phased assembly in order to validate candidate events; all were present in the assemblies.

A. chr1:69780635-69782916

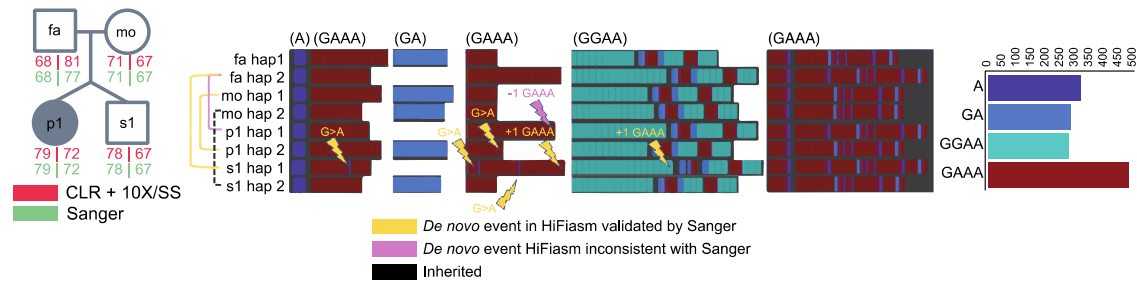

B. chr2:220545097-220547558

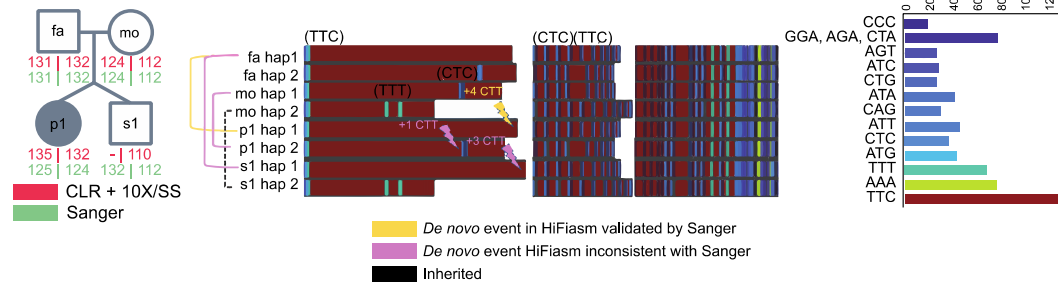

C. chr10:46270598-46272397

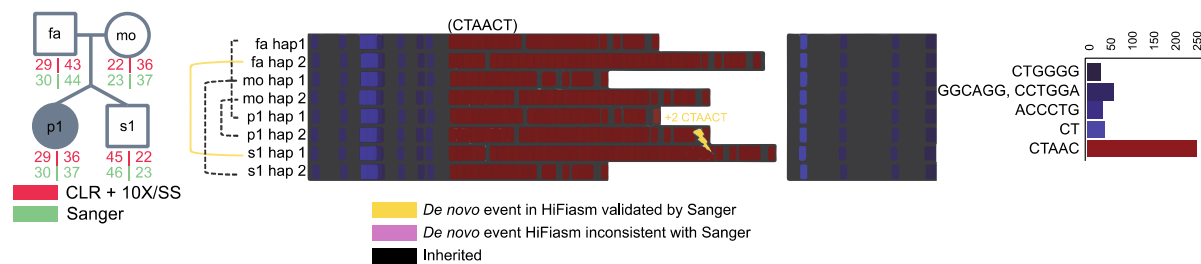

**Figure S6. Identified *de novo* STR events.** The structure of the family annotated with the number of STR copies detected in PacBio CLR haplotagged with 10X and Strand-seq data, and the assembled haplotypes for each individual, with variants highlighted by lightning bolts, depicted for an STR event in (A) the proband and sibling, (B) the proband, and (C) the sibling.



A. chr17-83135235-INS-52

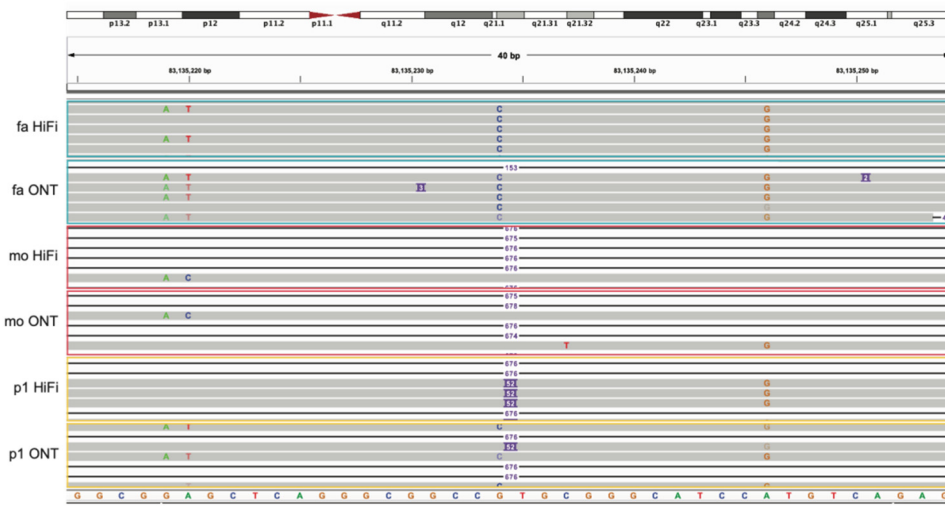

B. chr19-49691974-INS-73

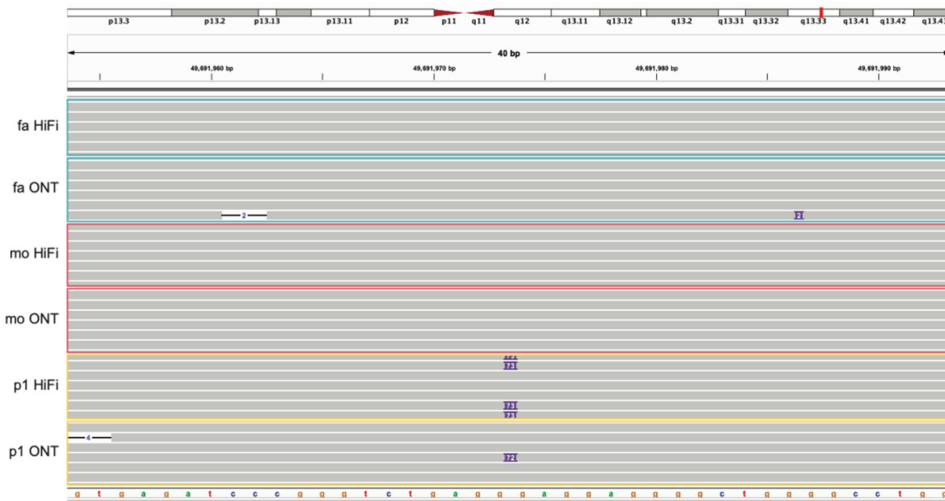

C. chr4-181240321-INS-51

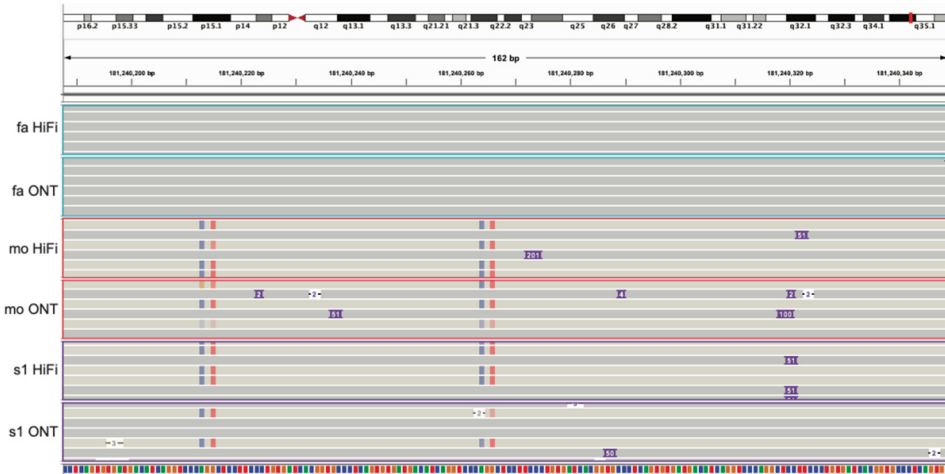

**Figure S8. IGV shots of *de novo* SVs.** IGV views of SV regions in the father, mother, and affected child across PacBio HiFi and ONT sequencing reads for (A) the 52 bp insertion in the proband, (B) the 73 bp insertion in the proband, and (C) the 51 bp insertion in the sibling.



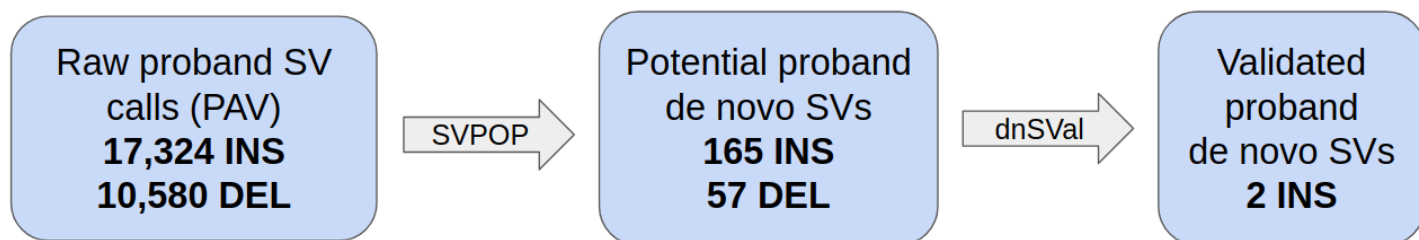

PAV: <https://github.com/EichlerLab/pav>  
 SVPOP: <https://github.com/EichlerLab/svpop>  
 dnSVal: [https://github.com/EichlerLab/denovo\\_sv\\_validation](https://github.com/EichlerLab/denovo_sv_validation)

**Figure S9. Overview of automated SV filtering process.** From the initial 27,904 *de novo* SV calls made in the proband, automated SVPOP filtering removed all but 232. The dnSVal validation uses subseq and multiple sequence alignment to further filter candidate *de novo* SV calls, resulting in a total of two validated *de novo* events in the proband—the same two that passed the manual filtering process.

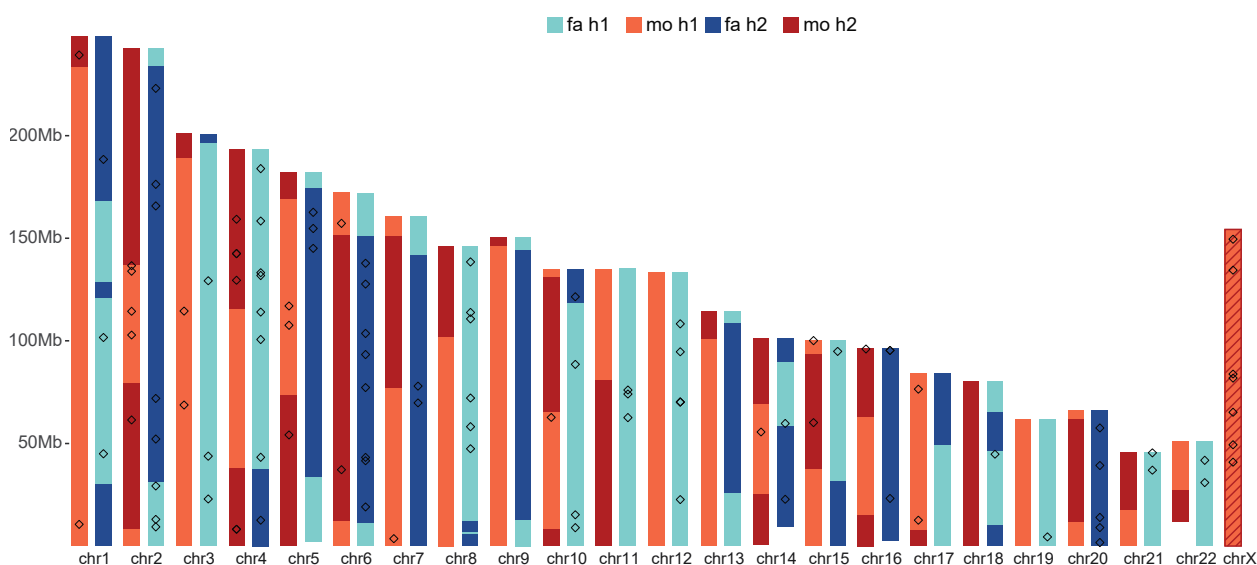

**Figure S10. Meiotic crossovers and DNM.** A genome-wide overview of detected meiotic recombination breakpoints for the sibling. Inherited segments of maternal homologs (H1-light red, H2-dark red) appear on the left side of each chromosome while inherited segments of paternal homologs (H1-light blue, H2-dark blue) appear on the right side of each chromosome. Recombination breakpoints are visible as changes from H1 to H2 segments and vice versa. Detected DNMs (n=105) that could have been assigned to a single parental homolog are shown as empty boxes over maternal (left) and paternal (right) homologs. This individual is a male meaning that maternal chromosome X does not recombine (empty red box).

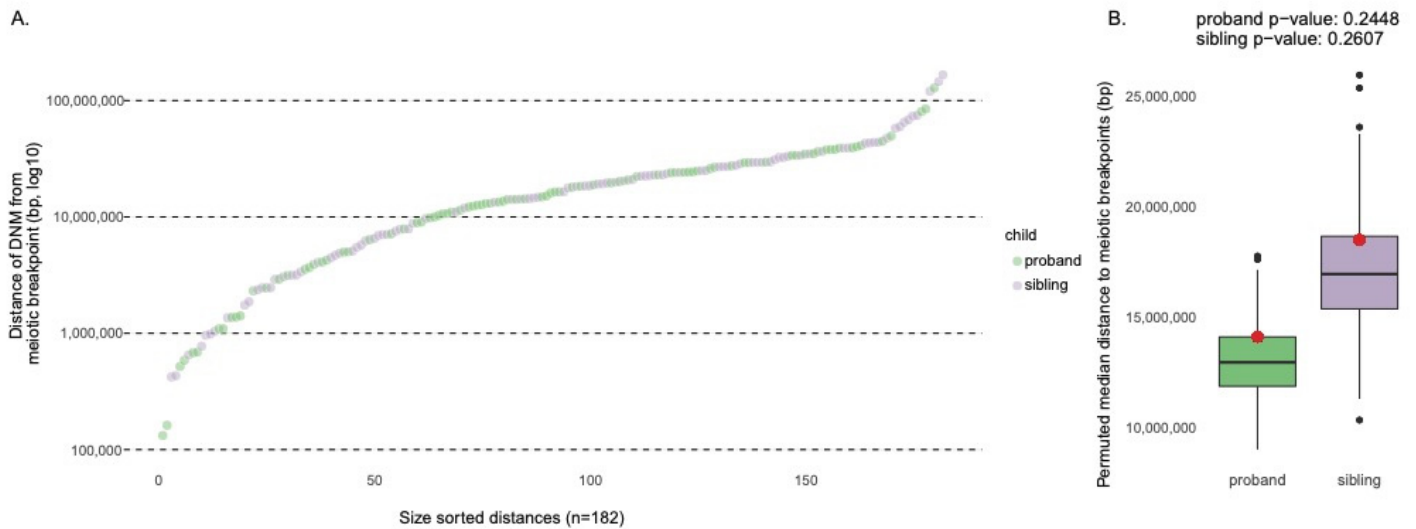

**Figure S11. Meiotic recombination distance to DNMs.** (A) Sorted distances of DNMs to the closest meiotic breakpoint reported for both proband (green) and sibling (purple). (B) An enrichment analysis comparing observed median distance of DNMs to meiotic breakpoints in comparison to permuted meiotic breakpoints (1000 permutations) separately for proband- and sibling-specific DNMs.

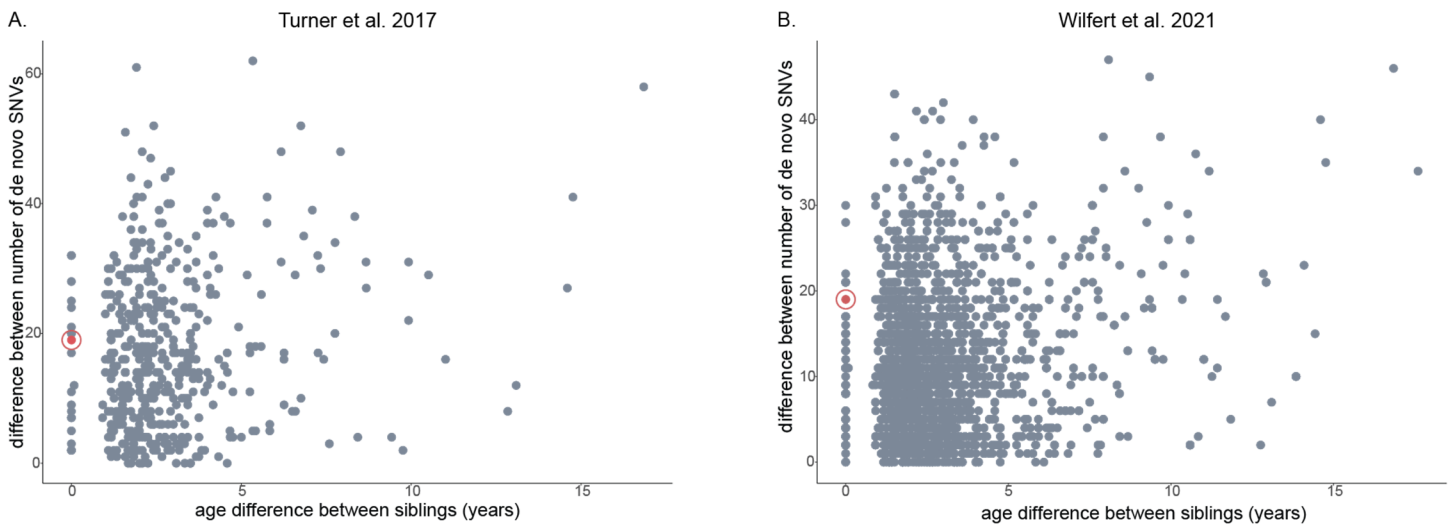

**Figure S12. Intersibling *de novo* mutation difference.** The differences in the DNM count are compared between proband and sibling as a function of the age difference between the siblings based on two previous studies. Red dots indicate Illumina-based estimates of intersibling DNM difference for the family studied here (SSC14455).

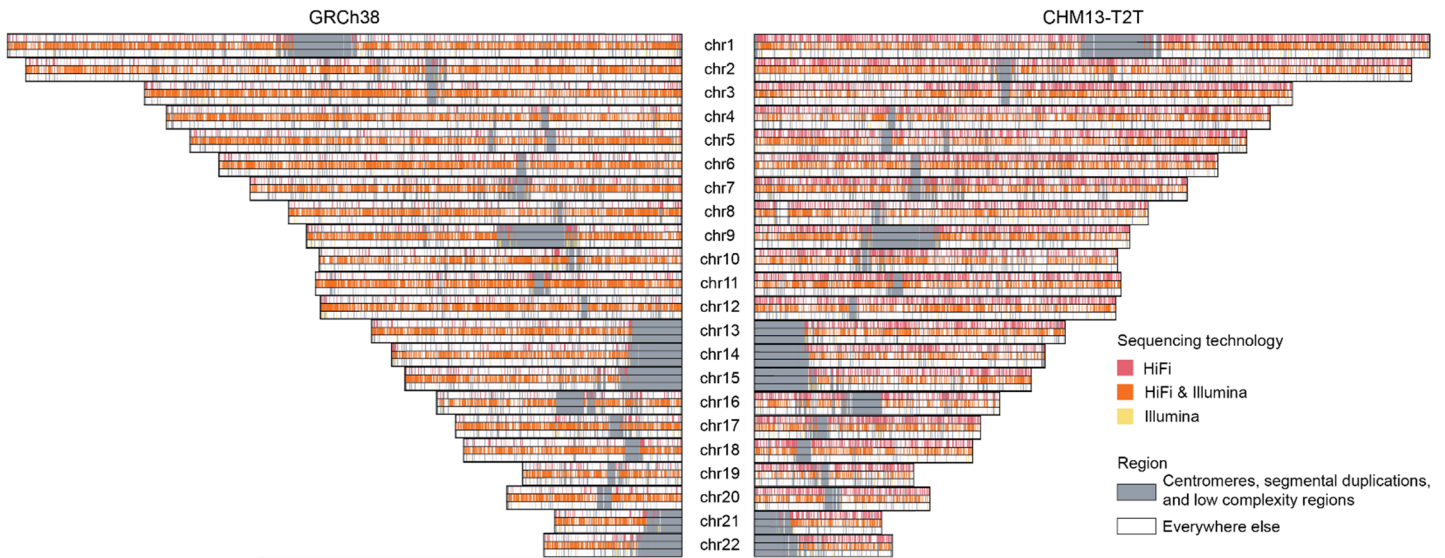

**Figure S13. Distribution of rare inherited SNVs.** Variant calls were made using GATK on GRCh38- (left) and T2T-CHM13- (right) aligned reads. Inherited variants were identified using a modification of the *de novo* pipeline to select all variants with genotype 0/1 or 1/1 in exactly one parent, and 0/1 in at least one child. Inherited candidates were filtered for depth >10 in both parents and children, genotype quality >25 in both parents and children, and allele balance >0.2 in all individuals with the variant. Variants were annotated with VEP for their frequency in gnomAD, and all variants with allele frequency less than 0.1% were classified as rare. Any variant that was confirmed to be present in the child's ONT data was retained for the final callset.

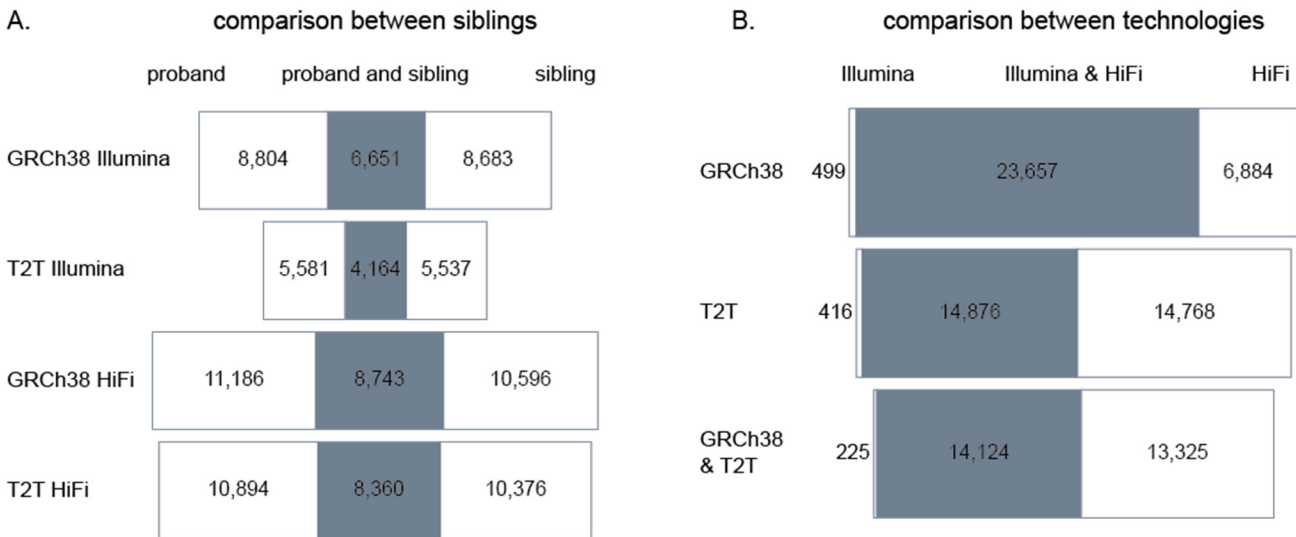

**Figure S14. Inherited variants by child and technology.** ONT-validated rare inherited SNV (<0.1% frequency in gnomAD) discovery comparing (A) proband and sibling callsets generated by Illumina or HiFi reads aligned to the GRCh38 or T2T-CHM13 references or (B) comparing discovery based on use of different sequencing technologies. In (B), sites identified in the same sample(s) were considered to be common to both callsets, whereas the same site identified in different samples would be considered unique to each callset. Gray bars in the Venn diagram represent shared SNVs based on platform or assembly while white bars represent SNVs unique to each. Inherited callsets generated using HiFi were larger than their Illumina counterparts, and nearly every site in the short-read callsets was also present in long-read callsets. The number of novel inherited T2T-CHM13 calls was fewer than GRCh38 callsets for both short and long reads - driven in part by a failure to liftover T2T-CHM13 to GRCh38 genomic coordinates.

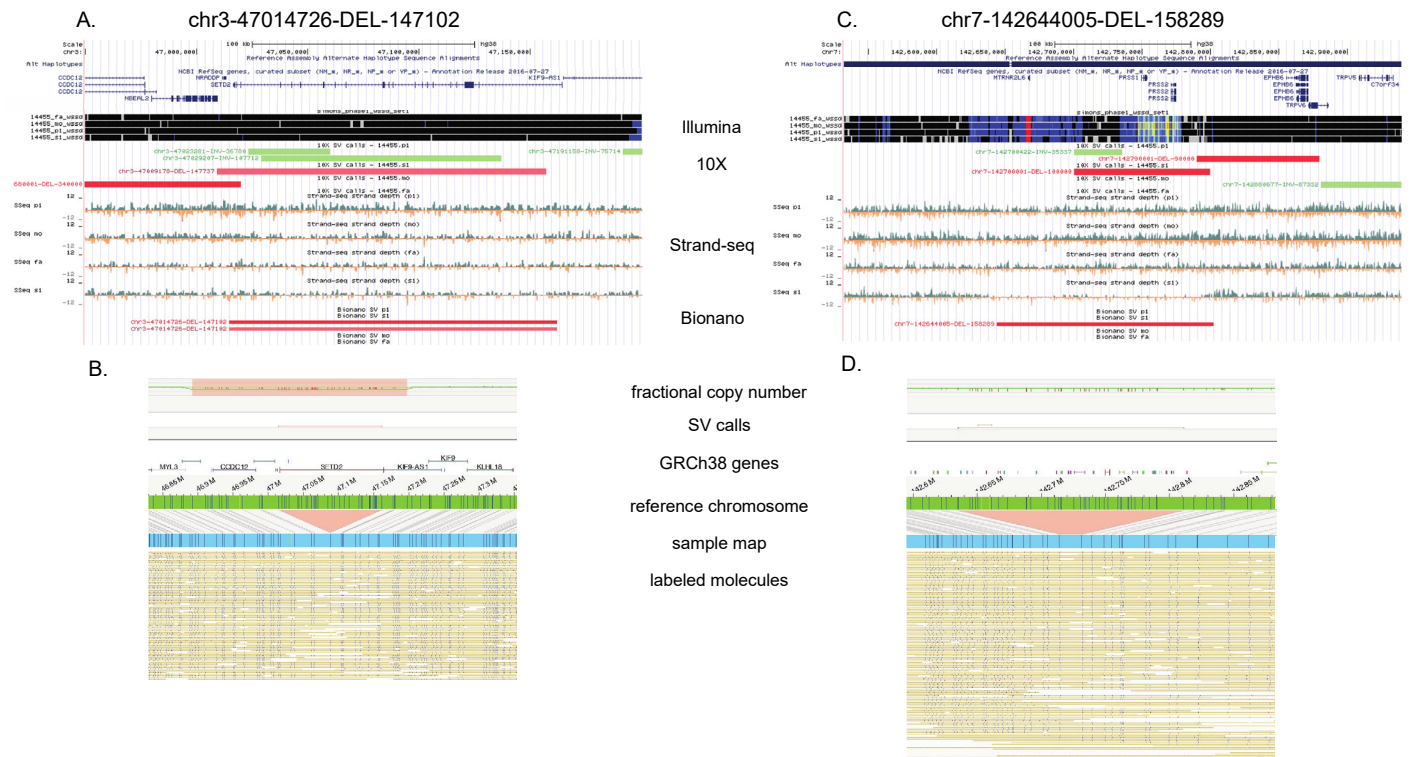

**Figure S15. Support for cell line artifacts.** (A) chr3-47014726-DEL-147102. Large sibling *SETD2* deletion cell line artifact discovered by 10X (LCL derived) and Bionano (LCL derived), but not supported by Strand-seq (LCL derived) or WSSD (blood derived). (B) Bionano support for *SETD2* deletion. The top bar represents the fractional copy number (green line is copy number two); the second bar is SV calls based on the assembly map. The red lines compare the green reference region to the sample map (the label pattern observed over the region). The bottom represents all the labeled molecules over the region. (C) chr7-142644005-DEL-158289. Large deletion over *PRSS1* and *PRSS2* is likely a cell line artifact with 10X, Bionano, and Strand-seq support. (D) Bionano support for *PRSS1* and *PRSS2* deletion, in the same format as B.

## Supplemental Tables

**Table S1. All candidate STR and VNTR events.**

| Chr   | Position  | Type | Motif                 | Calling approach          | Fa repeat copies | Mo repeat copies | P1 repeat copies | S1 repeat copies | Sanger validation |
|-------|-----------|------|-----------------------|---------------------------|------------------|------------------|------------------|------------------|-------------------|
| Chr1  | 69781685  | STR  | AAAG                  | LPT                       | 68   77          | 67   71          | 72   79          | 67   78          | True positive     |
| Chr1  | 103525498 | VNTR | ACGGCGGGGC<br>GGGGCGC | ExpansionHunter<br>Denovo | 9   14           | 11   11          | 11   15          | 11   14          | True positive     |
| Chr2  | 220546187 | STR  | TTC                   | LPT                       | 131   132        | 112   124        | 124   125        | 112   132        | True positive     |
| Chr10 | 46271376  | STR  | CTAACT                | 30-mer                    | 30   44          | 23   37          | 30   37          | 23   46          | True positive     |
| Chr2  | 133895459 | VNTR | AAGAGAGAGGG<br>GAGG   | ExpansionHunter<br>Denovo | 12   18          | 6   18           | 17   18          | 12   17          | Inherited         |
| Chr3  | 111780258 | STR  | AAG                   | LPT                       | 66   67          | 69   71          | 67   69          | 67   71          | Inherited         |
| Chr5  | 38824434  | STR  | CCACCA                | 30-mer                    | 18   21          | 18   19          | 18   19          | 19   21          | Inherited         |
| Chr13 | 44142133  | STR  | CTCGG                 | LPT                       | 18   25          | 18   NA          | 18   25          | 18   18          | Inherited         |
| Chr17 | 51831668  | STR  | AGC                   | LPT                       | 22   23          | 19   22          | 19   22          | 19   23          | Inherited         |
| Chr1  | 101657855 | STR  | TTC                   | LPT                       | NA               | NA               | NA               | NA               | Not supported     |
| Chr7  | 84690930  | STR  | GAA                   | LPT                       | 79   NA          | 71   NA          | NA               | 71   72          | Not supported     |
| Chr12 | 111257196 | VNTR | AAGAAGTGGGA<br>GGG    | ExpansionHunter<br>Denovo | 33   37          | 36   36          | 37   NA          | 37   NA          | Not supported     |
| Chr14 | 44005178  | STR  | AGA                   | LPT                       | NA               | 71   NA          | 76   77          | 76   77          | Not supported     |
| Chr14 | 99927754  | STR  | GTG                   | LPT                       | NA               | NA               | NA               | NA               | Not supported     |
| Chr16 | 20041114  | STR  | AGGAG                 | LPT                       | NA               | NA               | NA               | NA               | Not supported     |

Events were identified by one of three approaches: a custom k-mer based approach (30-mer), an approach based on the longest pure tandem repeat (LPT), and the tool ExpansionHunter Denovo.

**Table S2. 20-50 bp *de novo* calls in the proband and sibling.**

| Child    | Chr   | Position  | Indel type | Length | HiFi/ONT Validation      |
|----------|-------|-----------|------------|--------|--------------------------|
| 14455.p1 | chr7  | 906710    | DEL        | 45     | <b>potential de novo</b> |
| 14455.p1 | chr7  | 132561922 | DEL        | 28     | false positive           |
| 14455.p1 | chr11 | 82293621  | DEL        | 24     | inherited from mom       |
| 14455.p1 | chr16 | 14928921  | DEL        | 27     | inherited from mom       |
| 14455.p1 | chr16 | 61425944  | DEL        | 35     | false positive           |
| 14455.p1 | chr19 | 15778633  | DEL        | 40     | false positive           |
| 14455.p1 | chr21 | 39583858  | DEL        | 33     | inherited from dad       |
| 14455.p1 | chr2  | 90033846  | INS        | 21     | false positive           |
| 14455.p1 | chr2  | 114396849 | INS        | 44     | inherited from mom       |
| 14455.p1 | chr6  | 95411818  | INS        | 29     | inherited from mom       |
| 14455.p1 | chr8  | 57949332  | INS        | 44     | inherited from mom       |
| 14455.p1 | chr9  | 71816230  | INS        | 43     | false positive           |
| 14455.p1 | chr9  | 137350578 | INS        | 33     | inherited                |
| 14455.p1 | chr12 | 3978627   | INS        | 29     | false positive           |
| 14455.p1 | chr13 | 84254692  | INS        | 25     | inherited from dad       |
| 14455.p1 | chr15 | 99927049  | INS        | 22     | false positive           |
| 14455.p1 | chr18 | 32773926  | INS        | 32     | inherited from mom       |
| 14455.p1 | chr20 | 31890154  | INS        | 23     | inherited                |
| 14455.p1 | chr22 | 25093859  | INS        | 38     | false positive           |
| 14455.p1 | chr22 | 28867115  | INS        | 25     | false positive           |
| 14455.p1 | chrX  | 73002749  | INS        | 24     | <b>potential de novo</b> |
| 14455.s1 | chr8  | 67056650  | DEL        | 24     | inherited from mom       |
| 14455.s1 | chr10 | 128976652 | DEL        | 32     | inherited from dad       |
| 14455.s1 | chrX  | 40557339  | DEL        | 48     | inherited from mom       |
| 14455.s1 | chr1  | 19020904  | INS        | 45     | inherited from mom       |
| 14455.s1 | chr4  | 182833096 | INS        | 42     | inherited from mom       |
| 14455.s1 | chr5  | 29815038  | INS        | 28     | inherited from mom       |
| 14455.s1 | chr8  | 108938105 | INS        | 44     | inherited from mom       |
| 14455.s1 | chr8  | 128825889 | INS        | 32     | false positive           |
| 14455.s1 | chr8  | 143218041 | INS        | 21     | inherited                |
| 14455.s1 | chr9  | 42090783  | INS        | 44     | inherited from mom       |
| 14455.s1 | chr10 | 131625735 | INS        | 27     | inherited from mom       |
| 14455.s1 | chr11 | 33614584  | INS        | 21     | inherited from dad       |
| 14455.s1 | chr12 | 76955213  | INS        | 24     | inherited from mom       |
| 14455.s1 | chr13 | 87253488  | INS        | 23     | inherited from dad       |
| 14455.s1 | chr17 | 71886772  | INS        | 37     | inherited                |
| 14455.s1 | chr18 | 22204288  | INS        | 48     | inherited                |
| 14455.s1 | chrX  | 65373988  | INS        | 47     | <b>potential de novo</b> |
| 14455.s1 | chrY  | 1735802   | INS        | 34     | no read data             |

All 39 20-50 bp indel calls identified using assembly-driven variant discovery.

**Table S3. De novo SVs identified by Bionano Genomics.**

| Child    | Chr   | Position  | SV type | Length  | Population Frequency (%) |
|----------|-------|-----------|---------|---------|--------------------------|
| 14455.p1 | chr3  | 90544141  | DEL     | 4,656   | 2.5                      |
| 14455.p1 | chr14 | 105847409 | DEL     | 1,461   | 1                        |
| 14455.p1 | chr2  | 89995213  | INS     | 812     | 9.3                      |
| 14455.s1 | chr3  | 47014725  | DEL     | 147,102 | 0                        |
| 14455.s1 | chr7  | 142635453 | DEL     | 158,289 | 0                        |
| 14455.s1 | chr9  | 66003864  | DEL     | 905     | 0                        |
| 14455.s1 | chr21 | 8706195   | DEL     | 442,533 | 9.8                      |
| 14455.s1 | chr19 | 8729966   | INS     | 114,606 | 37.7                     |

Summary of *de novo* SVs detected by Bionano analysis of the proband and unaffected sibling generated from cell line DNA. Population frequency is determined by Bionano controls.

**Table S4. Crossover events in the proband and sibling. (See attached excel spreadsheet)**

All 451 crossover events identified in the proband and the sibling from Strand-seq data.

**Table S5. Distribution of DNMs by variant class.**

| Mutation type        | Affected child | Count |
|----------------------|----------------|-------|
| VNTR >50 bp (SV INS) | 14455.p1       | 2     |
|                      | 14455.s1       | 0     |
| VNTR <50 bp          | 14455.p1       | 1     |
|                      | 14455.s1       | 0     |
| STR                  | 14455.p1       | 4     |
|                      | 14455.s1       | 3     |
| indel                | 14455.p1       | 5     |
|                      | 14455.s1       | 9     |
| SNV                  | 14455.p1       | 81    |
|                      | 14455.s1       | 97    |

The number of mutations identified in each category - variable number tandem repeat (VNTR) expansions >50 bp (also represent SV insertions) and <50 bp, short tandem repeat (STR) expansions, short indels <20 bp (indels), and SNVs.

**Table S6. Master table of DNMs. (See attached excel spreadsheet)**

Every validated *de novo* event identified by this study, including STR/VNTR expansions, indels, SNVs, and potential mosaic mutations.
